# Supplementary material for: Butyrate supplementation regulates expression of chromosome segregation 1-like protein to reverse the genetic distortion caused by p53 mutations in colorectal cancer
Source: PubMed Central journal article supplement — Int J Oncol. 2022 Apr 13;60(6):64. doi: 10.3892/ijo.2022.5354 (PMC9084551; doi:10.3892/ijo.2022.5354), 2022-04-13

Figure S1. Relative expression levels of CSE1L as indicated by FITC in HCT116 p53<sup>-/-</sup> cells. Expression of CSE1L in HCT116 p53<sup>-/-</sup> cells during mitosis was determined by FITC from immunofluorescence staining. \*\*P<0.01 and \*\*\*P<0.001. CSE1L, chromosome segregation 1-like protein.

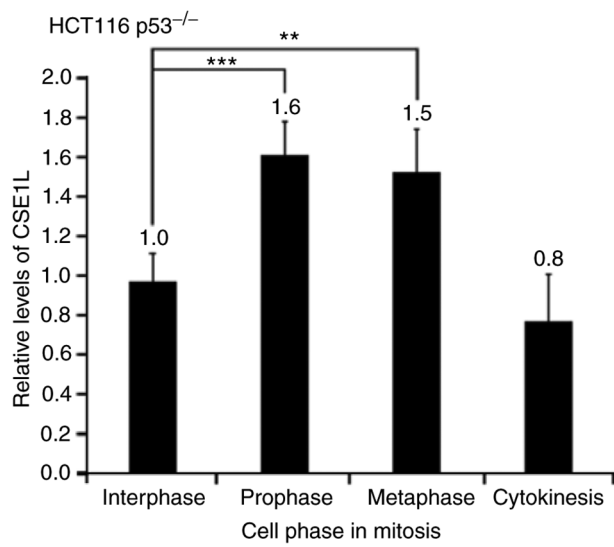

Figure S2. mRNA expression levels of CSE1L in SW480 cells and SW620 cells. mRNA expression levels of CSE1L in (A) SW480 and (B) SW620 cells after NaB treatment for 24 and 48 h. \* $P < 0.05$  and \*\* $P < 0.01$ . NaB, sodium butyrate'.

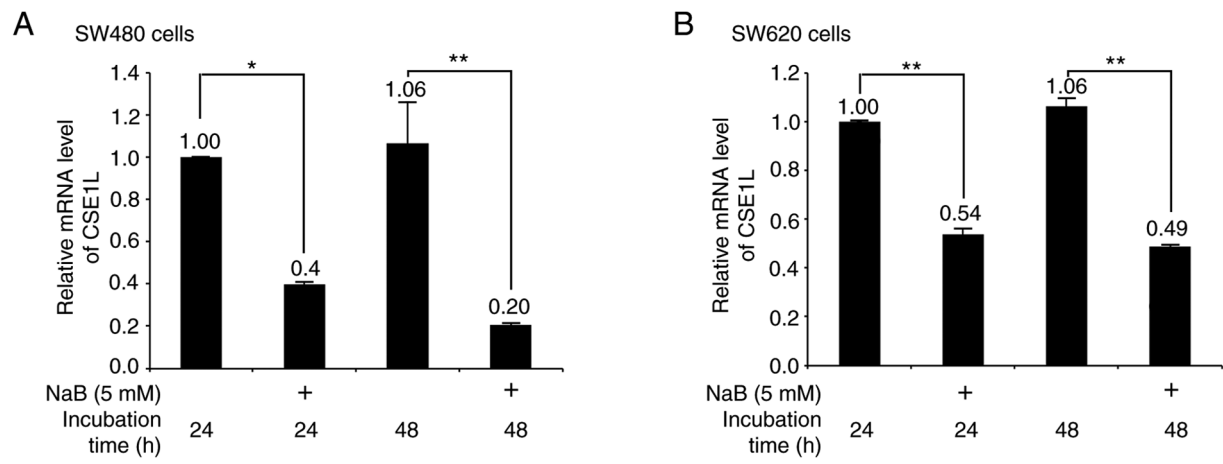

Supplement: Supplementary_Data.pdf [file Supplementary_Data.pdf]
